# Supplementary material
Source: PubMed Central journal article supplement (PMC546592)
Supplement: jvirol_79_4_2517__1.pdf [file jvirol_79_4_2517__1.pdf]

Supplemental Table S2. (Putative) cold regulated genes induced by AC2

| Gene/Product                                                                                                              | Basal transcript level on control chips | AC2          | Fold induction on AC2 chips | Flag          |
|---------------------------------------------------------------------------------------------------------------------------|-----------------------------------------|--------------|-----------------------------|---------------|
| At3g15280, unknown, low similarity to cold regulated gene REP14, <i>Secale cereale</i>                                    | 25 (7 to 35)                            | MYMV<br>ACMV | 25x<br>12x                  | A<br>P<br>P   |
| At5g15960, cold and ABA inducible protein KIN1                                                                            | 52 (32 to 84)                           | MYMV<br>ACMV | 23x<br>6x                   | A,P<br>P<br>P |
| At2g15970, similar to cold acclimation protein WCOR413, <i>Triticum aestivum</i>                                          | 1851 (301 to 6053)                      | MYMV<br>ACMV | 8x<br>15x                   | P<br>P<br>P   |
| At2g42530, cold-regulated protein COR15b precursor                                                                        | 61 (30 to 80)                           | MYMV<br>ACMV | 5x<br>10x                   | A,P<br>P<br>P |
| At4g30650, low temperature and salt responsive homologue of low temperature and salt responsive LTI6A, <i>A. thaliana</i> | 316 (240 to 418)                        | MYMV<br>ACMV | 5x<br>5x                    | P<br>P<br>P   |
| At5g15960, stress responsive homolog of low temperature and salt responsive protein LTI6A, <i>A. thaliana</i>             | 370 (271 to 445)                        | MYMV<br>ACMV | 2x<br>3x                    | P<br>P<br>P   |

Supplemental Table S3. Scarecrow transcription factor-like genes up-regulated by AC2

| Gene/Product                                               | Basal transcript level on control chips | AC2          | Fold induction on AC2 chips | Flag          |
|------------------------------------------------------------|-----------------------------------------|--------------|-----------------------------|---------------|
| At2g45160, Scarecrow transcription regulator-like, SCL6-II | 151 (88 to 299)                         | MYMV<br>ACMV | 3x<br>3x                    | A,P<br>P<br>P |
| At5g52510, Scarecrow transcription regulator-like, SCL8    | 233 (141 to 288)                        | MYMV<br>ACMV | 6x<br>5x                    | P<br>P<br>P   |

Supplemental Table S4. PCR-primers for AC2-inducible gene promoters from Arabidopsis

| Gene/Product                                   | Promoter region oligonucleotides: sense (NcoI underlined) and anti-sense (NcoI underlined, ATG start codon in bold), respectively                                                               | Promoter region length |
|------------------------------------------------|-------------------------------------------------------------------------------------------------------------------------------------------------------------------------------------------------|------------------------|
| At3g12460, Hypothetical 3'-5' exonuclease, WEL | 5'tcgag <u>CCatg</u> Gaggcatcgagtgagatcggaagc and 5'cggag <u>ccatGg</u> Ttttgcctcagttttcaagcagag                                                                                                | 980                    |
| At1g02813, Expressed protein                   | 5'aagcacc <u>TgG</u> tgttcggttacggagcggcgag and 5'aatgg <u>CcatG</u> gtttctgtttaactatctctgtg                                                                                                    | 1064                   |
| At1g13610, Hypothetical protein                | 5'gtaag <u>CcatGG</u> atctcggtattaacaaattagtcgtg and 5'cgccg <u>ccatG</u> gtcgacgtcgcaattccatttc                                                                                                | 984                    |
| At5g11540, Putative FAD-like oxidase           | 5'ccaga <u>CcatGG</u> Ttattatacacgtatcggtcattcggt and 5'gtaac <u>CcatgG</u> tatttgagagattatgtaattccgat                                                                                          | 990                    |
| At4g39675, Expressed, similar to HIV-1 p17     | 5'gcacc <u>CatgG</u> tactctaaacgtaaacctacac and 5'aaaat <u>CCatgG</u> Ttaagaataagatgtggttaagatttcg (the artificial ATG: 30 nt upstream of the first ATG, 70 nt downstream of putative TATA-box) | 894                    |
| At5g15960, Cold and ABA inducible protein KIN1 | 5'ccaa <u>ccatgg</u> gcttactactgatcc and 5'ctctg <u>CcatG</u> tttcagatatttattctgtaaaatcgt                                                                                                       | 793                    |

## Additional supplemental information:

### 1. CMA medium for *Arabidopsis* protoplasts (after J. Masson, ETH Zentrum, Zuerich; Karesch 1991)

|                                                            |        |
|------------------------------------------------------------|--------|
| ddH <sub>2</sub> O                                         | 700 ml |
| B5 macro                                                   | 100 ml |
| B5 micro                                                   | 1 ml   |
| FeCl <sub>3</sub> x 6H <sub>2</sub> O stock (2.7 g/500 ml) | 5 ml   |
| Na <sub>2</sub> EDTA stock (7.46 g/500 ml)                 | 5 ml   |
| B5 vita                                                    | 10 ml  |
| Glucose                                                    | 80 g   |
| Naphthalene acetic acid (NAA) stock (20 mg/100 ml)         | 5 ml   |
| 6-Benzylamino purine (6-BA) stock (20 mg/100 ml)           | 2.7 ml |

Stir for 1 hour, adjust pH to 5.8  
Add ddH<sub>2</sub>O to 1 liter  
Sterilize by filtration

#### B5 macro (1 liter):

|                                                     |        |
|-----------------------------------------------------|--------|
| ddH <sub>2</sub> O                                  | 950 ml |
| KNO <sub>3</sub>                                    | 25 g   |
| NaH <sub>2</sub> PO <sub>4</sub> x H <sub>2</sub> O | 1.5 g  |
| (NH <sub>4</sub> ) <sub>2</sub> SO <sub>4</sub>     | 1.34 g |
| MgSO <sub>4</sub> x 7H <sub>2</sub> O               | 2.5 g  |
| CaCl <sub>2</sub> x 2H <sub>2</sub> O               | 1.5 g  |

Stir and adjust volume to 1 liter  
Sterilize by autoclaving or filtration

#### B5 micro (100 ml):

|                                                      |        |
|------------------------------------------------------|--------|
| ddH <sub>2</sub> O                                   | 90 ml  |
| MnSO <sub>4</sub> x H <sub>2</sub> O                 | 1 g    |
| Na <sub>2</sub> MoO <sub>4</sub> x 2H <sub>2</sub> O | 25 mg  |
| H <sub>3</sub> BO <sub>3</sub>                       | 300 mg |
| ZnSO <sub>4</sub> x 7H <sub>2</sub> O                | 200 mg |
| CuSO <sub>4</sub> x 5H <sub>2</sub> O                | 2.5 mg |
| CoCl <sub>2</sub> x 6H <sub>2</sub> O                | 2.5 mg |
| KJ                                                   | 75 mg  |

Stir and adjust volume to 100 ml  
Sterilize by autoclaving or filtration

#### B5 vita (200 ml):

|                    |        |
|--------------------|--------|
| ddH <sub>2</sub> O | 190 ml |
| Nicotinic acid     | 20 mg  |
| Pyridoxin HCl      | 20 mg  |
| Thiamin HCl        | 200 mg |
| Inositol           | 2 g    |

Stir and adjust volume to 200 ml  
Sterilize by autoclaving or filtration

### 2. K3 medium for *Nicotiana plumbaginifolia* protoplasts

|                                                     |           |
|-----------------------------------------------------|-----------|
| NaH <sub>2</sub> PO <sub>4</sub> x H <sub>2</sub> O | 150 mg/l  |
| CaCl <sub>2</sub> x 2H <sub>2</sub> O               | 900 mg/l  |
| KNO <sub>3</sub>                                    | 2500 mg/l |
| NH <sub>4</sub> NO <sub>3</sub>                     | 250 mg/l  |
| (NH <sub>4</sub> ) <sub>2</sub> SO <sub>4</sub>     | 134 mg/l  |
| MgSO <sub>4</sub> x 7H <sub>2</sub> O               | 250 mg/l  |
| FeCl <sub>3</sub> x 6H <sub>2</sub> O               | 270 mg/l  |
| Na <sub>2</sub> EDTA                                | 746 mg/l  |
| B5 micro                                            | 1 ml      |
| B5 vita                                             | 10 ml     |
| NAA                                                 | 1 mg/l    |
| 6-BA                                                | 0.2 mg/l  |
| 2,4-D                                               | 0.1 mg/l  |
| xylose                                              | 250 mg/l  |
| glucose (or sucrose)                                | 0.4 M     |

Adjust pH to 5.6 and volume to 1 liter  
Sterilize by filtration
